# Supplementary material for: The Role of Constitutional Copy Number Variants in Breast Cancer
Source: Microarrays (Basel). 2015 Sep 8;4(3):407–23. doi: 10.3390/microarrays4030407 (PMC4996380; doi:10.3390/microarrays4030407)
Supplement: Supplementary File 1 [file microarrays-04-00407-s001.xlsx]

## Sheet: Sheet1
Reference	Platform	Calling algorithm	Cohorts	Genes disrupted by breakpoints	Region	Frequency in controls	Frequency in familial cases	Type	Regions Validated and Technology Used
Park Molecular Cancer, 2015	Affymetrix SNP 6.0 arrays	PennCNV	TCGA data: 336 breast cancer patients / 2956 controls		11p11.12	0	0.0149	Loss	-
					3p14.2	0.0007	0.0179	Loss	-
					3p24.1	0.0017	0.0208	Loss	-
Masson et al. Hereditary Cancer in Clinical Practice 2014	Affymetrix Cytogenetic Whole Genome 2.7 M	Chromosome Analysis Suite (ChAS)	129 familial breast cancer cases (BRCA1/2 mutation negative) / 40 healthy controls	B2M	15q21.1	0	0.0155039	Gain	-
				DSCAM	21q22.2	0	0.0155039	Gain	-
				G0S2	1q32.2	0	0.0155039	Gain	-
				GNG2	14q22.1	0	0.0155039	Gain	-
				GPR98	5q14.3	0	0.0155039	Gain	-
				IL8	4q13.3	0	0.0155039	Gain	-
				LAMB3	1q32.2	0	0.0155039	Gain	-
				LIMS1	2q13	0	0.0155039	Gain	-
				NBN	8q21.3	0	0.0155039	Gain	-
				TAGAP	6q25.3	0	0.0155039	Gain	-
				TRIM69	15q21.1	0	0.0155039	Gain	-
				CNTN4	3p26.3	0	0.0155039	Gain	-
				IMMP2L	7q31.1	0	0.0155039	Gain	-
				WWOX	16q23.1	0	0.0155039	Gain	Taqman
				ACYP2	2p16.2	0	0.0155039	Loss	-
				PCDH9	13q21.32	0	0.0155039	Loss	-
				SPINT4	20q13.12	0	0.0155039	Loss	-
				TSPYL6	2p16.2	0	0.0155039	Loss	-
				VAV3	1p13.3	0	0.0155039	Loss	-
				PIK3R5	17p13.1	0	0.0232558	Loss	-
				POU2F3	11q23.3	0	0.0232558	Loss	-
				ARHGEF12	11q23.3	0	0.0310078	Loss	-
				TMEM136	11q23.3	0	0.0310078	Loss	-
				NAMPT	7q22.2	0	0.0387597	Loss	-
Pylkas PLoS Genetics 2013	Illumina HumanOmni1-Quad BeadChips	Nexus Copy Number Discovery Edition 5.1 software	103 familial breast cancer cases (BRCA1/2 mutation negative)/ 75 early onset (<40yrs) breast cancer cases / 128 healthy controls	STRN		0		dup	Affymetrix Genome-Wide Human SNP Array 6.0 platform (Affymetrix, Santa Clara, CA, USA) or quantitative real time PCR (qPCR).
				CCDC150		0		dup	Affymetrix Genome-Wide Human SNP Array 6.0 platform (Affymetrix, Santa Clara, CA, USA) or quantitative real time PCR (qPCR).
				HECW2		0		dup	Affymetrix Genome-Wide Human SNP Array 6.0 platform (Affymetrix, Santa Clara, CA, USA) or quantitative real time PCR (qPCR).
				LRRFIP1		0		dup	Affymetrix Genome-Wide Human SNP Array 6.0 platform (Affymetrix, Santa Clara, CA, USA) or quantitative real time PCR (qPCR).
				ITGA9		0		del	Affymetrix Genome-Wide Human SNP Array 6.0 platform (Affymetrix, Santa Clara, CA, USA) or quantitative real time PCR (qPCR).
				KCNIP4		0		dup	Affymetrix Genome-Wide Human SNP Array 6.0 platform (Affymetrix, Santa Clara, CA, USA) or quantitative real time PCR (qPCR).
				MARCH6		0		dup	Affymetrix Genome-Wide Human SNP Array 6.0 platform (Affymetrix, Santa Clara, CA, USA) or quantitative real time PCR (qPCR).
				EYS		0		del	Affymetrix Genome-Wide Human SNP Array 6.0 platform (Affymetrix, Santa Clara, CA, USA) or quantitative real time PCR (qPCR).
				NXPH1		0		del	Affymetrix Genome-Wide Human SNP Array 6.0 platform (Affymetrix, Santa Clara, CA, USA) or quantitative real time PCR (qPCR).
				EXT1		0		del	Affymetrix Genome-Wide Human SNP Array 6.0 platform (Affymetrix, Santa Clara, CA, USA) or quantitative real time PCR (qPCR).
				EIF2C2		0		dup	Affymetrix Genome-Wide Human SNP Array 6.0 platform (Affymetrix, Santa Clara, CA, USA) or quantitative real time PCR (qPCR).
				TRAPPC9		0		dup	Affymetrix Genome-Wide Human SNP Array 6.0 platform (Affymetrix, Santa Clara, CA, USA) or quantitative real time PCR (qPCR).
				ARHGAP39		0		del	Affymetrix Genome-Wide Human SNP Array 6.0 platform (Affymetrix, Santa Clara, CA, USA) or quantitative real time PCR (qPCR).
				PPP1R16A		0		del	Affymetrix Genome-Wide Human SNP Array 6.0 platform (Affymetrix, Santa Clara, CA, USA) or quantitative real time PCR (qPCR).
				TMEM2		0		dup	Affymetrix Genome-Wide Human SNP Array 6.0 platform (Affymetrix, Santa Clara, CA, USA) or quantitative real time PCR (qPCR).
				TRPM3		0		dup	Affymetrix Genome-Wide Human SNP Array 6.0 platform (Affymetrix, Santa Clara, CA, USA) or quantitative real time PCR (qPCR).
				DAB2IP		0		del	Affymetrix Genome-Wide Human SNP Array 6.0 platform (Affymetrix, Santa Clara, CA, USA) or quantitative real time PCR (qPCR).
				GGTA1		0		del	Affymetrix Genome-Wide Human SNP Array 6.0 platform (Affymetrix, Santa Clara, CA, USA) or quantitative real time PCR (qPCR).
				DCLRE1C		0		del	Affymetrix Genome-Wide Human SNP Array 6.0 platform (Affymetrix, Santa Clara, CA, USA) or quantitative real time PCR (qPCR).
				ANKS1B		0		dup	Affymetrix Genome-Wide Human SNP Array 6.0 platform (Affymetrix, Santa Clara, CA, USA) or quantitative real time PCR (qPCR).
				UHRF1BP1L		0		dup	Affymetrix Genome-Wide Human SNP Array 6.0 platform (Affymetrix, Santa Clara, CA, USA) or quantitative real time PCR (qPCR).
				KLHL1		0		del	Affymetrix Genome-Wide Human SNP Array 6.0 platform (Affymetrix, Santa Clara, CA, USA) or quantitative real time PCR (qPCR).
				ESR2		0		dup	Affymetrix Genome-Wide Human SNP Array 6.0 platform (Affymetrix, Santa Clara, CA, USA) or quantitative real time PCR (qPCR).
				SYNE2		0		dup	Affymetrix Genome-Wide Human SNP Array 6.0 platform (Affymetrix, Santa Clara, CA, USA) or quantitative real time PCR (qPCR).
				SEMA4B		0		dup	Affymetrix Genome-Wide Human SNP Array 6.0 platform (Affymetrix, Santa Clara, CA, USA) or quantitative real time PCR (qPCR).
				BLM		0		dup	Affymetrix Genome-Wide Human SNP Array 6.0 platform (Affymetrix, Santa Clara, CA, USA) or quantitative real time PCR (qPCR).
				RBFOX1		0		dup	Affymetrix Genome-Wide Human SNP Array 6.0 platform (Affymetrix, Santa Clara, CA, USA) or quantitative real time PCR (qPCR).
				AADACL3		0.0078125	0.0266667	dup	Affymetrix Genome-Wide Human SNP Array 6.0 platform (Affymetrix, Santa Clara, CA, USA) or quantitative real time PCR (qPCR).
				VPS13D		0.0078125	0.0266667	dup	Affymetrix Genome-Wide Human SNP Array 6.0 platform (Affymetrix, Santa Clara, CA, USA) or quantitative real time PCR (qPCR).
				CYP2C19		0.0234375	0.0582524	del	Affymetrix Genome-Wide Human SNP Array 6.0 platform (Affymetrix, Santa Clara, CA, USA) or quantitative real time PCR (qPCR).
Krepischi et al Breast Cancer Research 2012	Agilent 180K - array-CGH	Genomic Workbench software	68 familial breast cancer cases (BRCA1/2 mutation negative) / 100 healthy controls	ST6GALNAC3		0		del	qPCR
				ST6GALNAC5		0		del	-
				PIGK		0		del	-
				KIF26B		0		del	-
				FGGY		0		del	-
				ASAP2		0		del	-
				KYNU		0		dup	-
				ARHGAP15		0		dup	-
				WDR75		0		dup	-
				KCNH8		0		dup	-
				MIR4791		0		dup	-
				FGF12		0		dup	-
				FAM160A1		0		del	-
				HMGCLL1		0		dup	-
				KIAA1797		0		del	qPCR
				MIR491		0		del	-
				INSL6		0		del	-
				INSL4		0		del	-
				RLN2		0		del	-
				PALM2-AKAP2		0		del	-
				AKAP2		0		del	-
				C9orf152		0		del	-
				TXN		0		del	-
				CUBN		0		dup	-
				POLR2G		0		dup	-
				TAF6L		0		dup	-
				TMEM179B		0		dup	-
				TMEM223		0		dup	-
				CDH13		0		del	-
				ANKRD26P1		0		dup	-
				SHCBP1		0		dup	-
				VPS35		0		dup	-
				ACOX1		0		dup	-
				TEN1		0		dup	-
				CDK3		0		dup	-
				MEP1B		0		dup	-
				C21orf7		0		del	-
				LINC00189		0		del	-
				BACH1		0		del	-
				GRIK1		0		del	-
				YBEY		0		dup	-
				C21orf58		0		dup	-
				PCNT		0		dup	-
				DIP2A		0		dup	-
				TMEM164		0		del	-
				MIR3978		0		del	-
				ACTRT1		0		del	-
				FAM155B		0		dup	-
				EDA		0		dup	qPCR
				HDHD1		0		dup	-
				STS		0		dup	-
				VCX		0		dup	-
				PNPLA4		0		dup	-
				CXorf26		0		dup	-
				TXNDC8		0		del	-
				SVEP1		0		del	-
				NXF1		0		dup	-
Suehiro et al., Tumour Biology 2012	NimbleGen human CGH 2.1 M	Nexus Copy Number version 5.0 software	30 DNA samples from women without a history of breast cancer / 30 DNA samples from patients with a history of breast cancer. qPCR - 193 DNA samples from women without a history of breast cancer / 170 DNA samples from patients with a history of breast cancer	EIF4G3		59	84	del	qPCR
				PCSK6		30	77	del	qPCR
Kuusisto et al PLoS One 2013	Illumina HumanCytoSNP-12 v.2.1	PennCNV, QuantiSNP v2.3, and cnvPartition v3.1.6	84 familial breast cancer cases (BRCA1/2 mutation negative) / 36 healthy controls. qPCR - 20 familial breast cancer cases (BRCA1/2 mutation negative) / 299–869 healthy controls	ERBB4		5	3	del	qPCR
				EPHA3		12	6	del	qPCR
				CSMD1		5	6	del	qPCR
				BRCA1,		1	0	del	qPCR
				ERVV-2		10	10	dup	qPCR
Silva et al. Orphanet Journal of Rare Diseases 2014	Agilent 180K - array-CGH	Genomic Workbench software	22 breast cancer cases from TP53 mutation negative Li-Fraumeni-like syndrome families / 100 healthy controls	HSFX1		0		dup	-
				MAGEA9		0		dup	-
				MAGEA8		0		dup	-
				DOT1L		0		dup	-
				PLEKHJ1		0		dup	-
				hsa-mir-1227		0		dup	-
				PCDHA11		0		dup	-
				PCDHA12		0		dup	-
				PCDHA13		0		dup	-
				MAD1L1		0		del	-
				FTSJ2		0		del	-
				PCDHA11		0		del	-
				PCDHA12		0		del	-
				PCDHA13		0		del	-
